# Supplementary material
Source: publisher figshare collection journal article supplement (https://tandf.figshare.com/ndownloader/files/31150775)
Supplement: Supplementary file 1 [file 31150775]

**Table:- S1**

Showing values of diameter of decolorized region measured in triplicate at different time intervals

| Time (hrs) | *Diameter of decolorized zone (cm) | | | | | | | | |
| --- | --- | --- | --- | --- | --- | --- | --- | --- | --- |
| **Plate 1** | | **Plate 2** | | **Plate 3** | **Average** | **Std. Deviation** | **Std. Error** | |
| 24 | 3.7 | 3.64 | | 3.58 | | 3.64 | 0.06 | | 0.035 |
| 48 | 4.9 | 5 | | 4.75 | | 4.88 | 0.13 | | 0.075 |
| 72 | 6.75 | 6.62 | | 6.8 | | 6.72 | 0.09 | | 0.052 |
| 96 | 8.9 | 8.85 | | 8.95 | | 8.90 | 0.05 | | 0.046 |

*Average, standard (Std.) deviation and std. error values shown are in correspondence to triplicate values of decolorized region
